# Supplementary material for: Implementing a quality improvement initiative for private healthcare facilities to achieve accreditation: experience from India
Source: Springer Nature journal article supplement (doi:10.1186/s12913-023-09619-w), 2023-07-27
Supplement: MOESM3 [file 25854252]

## SUPPLEMENTARY MATERIAL

**Table 1. List of objective elements which were achieved by all the facilities**

| Sl.No.  | Name of Objective Element                                                                                                                      | Achievement (% of facilities) |
|---------|------------------------------------------------------------------------------------------------------------------------------------------------|-------------------------------|
| COP.4.a | Care of patient is in consonance with the documented procedures.                                                                               | 100%                          |
| COP.8.d | Qualified persons are permitted to perform the procedures that they are entitled to perform.                                                   | 100%                          |
| MOM.1.e | Documented procedures address procurement and usage of implantable prosthesis.                                                                 | 100%                          |
| PRE.1.c | Patient rights include treating patient information as confidential.                                                                           | 100%                          |
| PRE.1.f | Patient rights include information on the expected cost of the treatment.                                                                      | 100%                          |
| PRE.1.g | Patient has a right to have an access to his / her clinical records.                                                                           | 100%                          |
| ROM.2.b | The leaders/management guide the organization to function in an ethical manner.                                                                | 100%                          |
| ROM.2.d | The organization's billing process is accurate and ethical.                                                                                    | 100%                          |
| IMS.1.b | Organization identifies those authorized to make entries in medical record.                                                                    | 100%                          |
| IMS.2.c | Operative and other procedures performed are incorporated in the medical record.                                                               | 100%                          |
| IMS.2.f | Care providers have access to current and past medical record.                                                                                 | 100%                          |
| IMS.3.b | Privileged health information is used for the purposes identified or as required by law and not disclosed without the patient's authorization. | 100%                          |

**Table 2. List of objective elements which were most commonly not achieved by the facilities (ie. the most common non-compliances)**

| Sl.No.  | Name of Objective Element                                                                                                               | Achievement (% of facilities) |
|---------|-----------------------------------------------------------------------------------------------------------------------------------------|-------------------------------|
| MOM.2.c | Medication orders are clear, legible, dated and signed.                                                                                 | 36%                           |
| IMS.1.d | The author of the entry can be identified.                                                                                              | 39%                           |
| AAC.7.e | Discharge summary incorporates instructions about when and how to obtain urgent care.                                                   | 39%                           |
| COP.7.e | Informed consent for administration of anaesthesia is obtained by the anaesthetist.                                                     | 39%                           |
| AAC.3.a | The organization defines the content of the assessments for in-patients and emergency patients.                                         | 43%                           |
| AAC.5.c | Laboratory results are available within a defined time frame and critical results are intimated immediately to the concerned personnel. | 46%                           |
| COP.8.b | An informed consent is obtained by a surgeon prior to the procedure.                                                                    | 46%                           |
| IMS.1.c | Every medical record entry is dated and timed.                                                                                          | 50%                           |
| CQI.2.a | Organization shall identify the appropriate key performance indicators in both clinical and managerial areas.                           | 50%                           |
| COP.7.d | An immediate preoperative re-evaluation is documented.                                                                                  | 50%                           |

**Table 3. Distribution of non-compliances by facility characteristics**

| Facility characteristics |                              | Number of non-compliances<br>(% of Total) |              |              |            |             |            |            |             |            |             | Total number of non-compliances | Average non-compliances per facility |
|--------------------------|------------------------------|-------------------------------------------|--------------|--------------|------------|-------------|------------|------------|-------------|------------|-------------|---------------------------------|--------------------------------------|
|                          |                              | Chapter 1                                 | Chapter 2    | Chapter 3    | Chapter 4  | Chapter 5   | Chapter 6  | Chapter 7  | Chapter 8   | Chapter 9  | Chapter 10  |                                 |                                      |
| State                    | Jharkhand                    | 28<br>(25%)                               | 26<br>(24%)  | 14<br>(13%)  | 3<br>(3%)  | 7<br>(6%)   | 6<br>(5%)  | 3<br>(3%)  | 10<br>(9%)  | 4<br>(4%)  | 9<br>(8%)   | 110                             | 22                                   |
|                          | Maharashtra                  | 34<br>(20%)                               | 31<br>(18%)  | 27<br>(16%)  | 2<br>(1%)  | 14<br>(8%)  | 5<br>(3%)  | 4<br>(2%)  | 24<br>(14%) | 9<br>(5%)  | 22<br>(13%) | 172                             | 22                                   |
|                          | Uttar Pradesh                | 94<br>(17%)                               | 139<br>(25%) | 78<br>(14%)  | 13<br>(2%) | 35<br>(6%)  | 22<br>(4%) | 21<br>(4%) | 59<br>(11%) | 46<br>(8%) | 42<br>(8%)  | 549                             | 37                                   |
| Number of beds           | ≤50                          | 141<br>(19%)                              | 168<br>(22%) | 108<br>(14%) | 16<br>(2%) | 51<br>(7%)  | 31<br>(4%) | 25<br>(3%) | 83<br>(11%) | 58<br>(8%) | 67<br>(9%)  | 748                             | 30                                   |
|                          | >50                          | 15<br>(18%)                               | 28<br>(34%)  | 11<br>(13%)  | 2<br>(2%)  | 5<br>(6%)   | 2<br>(2%)  | 3<br>(4%)  | 10<br>(12%) | 1<br>(1%)  | 6<br>(7%)   | 83                              | 28                                   |
| Monthly delivery load    | <20                          | 40<br>(17%)                               | 59<br>(25%)  | 35<br>(15%)  | 2<br>(1%)  | 18<br>(8%)  | 8<br>(3%)  | 9<br>(4%)  | 23<br>(10%) | 22<br>(9%) | 21<br>(9%)  | 237                             | 26                                   |
|                          | 20-50                        | 82<br>(19%)                               | 95<br>(22%)  | 62<br>(14%)  | 14<br>(3%) | 23<br>(5%)  | 22<br>(5%) | 15<br>(3%) | 50<br>(11%) | 35<br>(8%) | 40<br>(9%)  | 438                             | 31                                   |
|                          | >50                          | 34<br>(22%)                               | 42<br>(27%)  | 22<br>(14%)  | 2<br>(1%)  | 15<br>(10%) | 3<br>(2%)  | 4<br>(3%)  | 20<br>(13%) | 2<br>(1%)  | 12<br>(8%)  | 156                             | 31                                   |
| Type of facility         | Exclusive maternity facility | 66<br>(19%)                               | 65<br>(18%)  | 57<br>(16%)  | 8<br>(2%)  | 27<br>(8%)  | 15<br>(4%) | 9<br>(3%)  | 41<br>(12%) | 26<br>(7%) | 38<br>(11%) | 352                             | 32                                   |
|                          | Multi-specialty facility     | 90<br>(19%)                               | 131<br>(37%) | 62<br>(13%)  | 10<br>(2%) | 29<br>(6%)  | 18<br>(4%) | 19<br>(4%) | 52<br>(11%) | 33<br>(7%) | 35<br>(7%)  | 479                             | 28                                   |
